# Supplementary material for: Tick-Borne Rickettsioses, Neglected Emerging Diseases in Rural Senegal
Source: PLOS journal article supplement (doi:10.1371/journal.pntd.0000821), 2010-09-14
Supplement: S1 (10.1371/journal.pntd.0000821.s001) [file journal.pntd.0000821.s001]

ÈÑÕÎÄÍÛÅ ÄÀÍÍÛÅ: Ðèêêåòñèîçû ÿâëÿþòñÿ îäíîé èç îñíîâíûõ ïðè÷èí ëèõîðàäî÷íûõ çàáîëåâàíèé ñðåäè âåðíóâøèõñÿ èç Àôðèêè òóðèñòîâ è ïóòåøåñòâåííèêîâ èç ðàçâèòûõ ñòðàí, îäíàêî, ïðàêòè÷åñêè íè÷åãî íå èçâåñòíî îá èõ ðàñïðîñòðàíåííîñòè ñðåäè ìåñòíîãî íàñåëåíèÿ, îñîáåííî â Çàïàäíîé Àôðèêå. ÌÅÒÎÄÎËÎÃÈß/ÎÑÍÎÂÍÛÅ ÐÅÇÓËÜÒÀÒÛ: Ñåðîëîãè÷åñêèé ìîíèòîðèíã (ðåàêöèÿ íåïðÿìîé èììóíîôëþîðåñöåíöèè ñ øåñòüþ ðèêêåòñèàëüíûìè àíòèãåíàìè, ãðóïï êëåùåâîé ïÿòíèñòîé ëèõîðàäêè è ñûïíîãî òèôà) ïîêàçàë, ÷òî â 21.4% è 51% (äåðåâíè Äèåëüìî è Íäèîï ðåãèîíà Ñèíå-Ñàëóì â Ñåíåãàëå) èñëëåäóåìûå ñûâîðîòêè ñîäåðæàëè àíòèòåëà ê ðèêêåòñèÿì ãðóïïû êëåùåâîé ïÿòíèñòîé ëèõîðàäêè. Ìû òàêæå èññëåäîâàëè ðîëü ðèêêåòñèé â ñòðóêòóðå îñòðûõ ëèõîðàäî÷íûõ çàáîëåâàíèé íåìàëÿðèéíîãî ïðîèñõîæäåíèÿ â ýòèõ æå äåðåâíÿõ. Èññëåäîâàëîñü ïðèñóòñòâèå ÄÍÊ ðèêêåòñèé â 204 îáðàçöàõ êðîâè 134 æèòåëåé (62 ìóæ÷èíû è 72 æåíùèíû), îáðàòèâøèõñÿ â äåðåâåíñêèé äèñïàíñåð ñ îñòðûì ëèõîðàäî÷íûì çàáîëåâàíèåì è ó êîòîðûõ ïðè îáñëåäîâàíèè íå áûëà íàéäåíà ìàëÿðèÿ. ÄÍÊ èçâëåêàëàñü èç öåëüíîé êðîâè è áûëà ïðîòåñòèðâîàíà äâóìÿ ñèñòåìàìè ÏÖÐ â ðåàëüíîì âðåìåíè. ÄÍÊ ðèêêåòñèé áûëà îáíàðóæåíà ó 9 áîëüíûõ, â âîñüìè ñëó÷àÿõ ýòî áûëà ÄÍÊ Rickettsia felis (äàííûå îïóáëèêîâàíû â îòäåëüíîé ñòàòüå). Â îäíîì ñëó÷àå, â ïåðâûé ðàç â Çàïàäíîé Àôðèêå, áûëà äèàãíîñòèðîâàíà èíôåêöèÿ Rickettsia conorii. Ìû òàêæå èññëåäîâàëè 2767 èêñîäîâûõ êëåùåé, ñîáðàííûõ â äâóõ ðåãèîíàõ Ñåíåãàëà (Ñèíå-Ñàëóì è Íèàõàð) ñ äîìàøíèõ æèâîòíûõ (êîðîâû, îâöû, êîçû, îñëû è ëîøàäè) â ÏÖÐ â ðåàëüíîì âðåìåíè è îáíàðóæèëè ïðèñóòñòâèå 5 ðàçíûõ ðèêêåòñèé. Rickettsia aeschlimannii áûëà îáíàðóæåíà â êëåùàõ Hyalomma marginatum rufipes (51.3% è 44.8% â ðåãèîíàõ Íèàõàð è Ñèíå-Ñàëóì, ñîîòâåòñòâåííî), è Hyalomma truncatum (6% è 6.8%), à òàêæå â Rhipicephalus evertsi evertsi (0.5%, òîëüêî â ðåãèîíå Íèàõàð); R. c. conorii â êëåùàõ Rh. e. evertsi (0.4%, òîëüêî â Ñèíå-Ñàëóì); Rickettsia massiliae â êëåùàõ Rhipicephalus guilhoni (22.4%, òîëüêî â Íèàõàð); Rickettsia sibirica mongolitimonae â Hyalomma truncatum (13.5%, òîëüêî â Ñèíå-Ñàëóì); è Rickettsia africae â Rhipicephalus evertsi evertsi (0.7% â 0.4% â ðåãèîíàõ Íèàõàð è Ñèíå-Ñàëóì, ñîîòâåòñòâåííî), à òàêæå â êëåùàõ Rhipicephalus (Boophilus) annulatus (20%, òîëüêî â Ñèíå-Ñàëóì). Ìû òàêæå âûäåëèëè äâà øòàììà ðèêêåòñèé èç êëåùåé H. truncatum: R. s. mongolitimonae è R. aeschlimannii. ÇÀÊËÞ×ÅÍÈÅ/ÂÛÂÎÄÛ: Ìû ñ÷èòàåì, ÷òî ïðåäñòàâëåííûå äàííûå âêóïå ñ ðàíåå îïóáëèêîâàííûìè äàííûìè ïî âûñîêîé çàðàæåííîñòè R. africae êëåùåé ðîäà Amblyomma è ïî ðîëè R. felis â ãåíåçå ëèõîðàäî÷íûõ çàáîëåâàíèé ñâèäåòåëüñòâóþò î çíà÷èòåëüíîé ðîëè ðèêêåòñèé â ñòðóêòóðå ëèõîðàäî÷íîé çàáîëåâàåìîñòè ñåëüñêîãî íàñåëåíèÿ Çàïàäíîé Àôðèêè.
